# Supplementary material for: A desirable coplanar energetic pentazolate salt driven by hydrogen bonds
Source: Royal Society of Chemistry journal article supplement (doi:10.1039/d3ce01234d), 2024-01-01
Supplement: d3ce01234d1.pdf [file d3ce01234d1.pdf]

## Supporting Information

### A desirable coplanar energetic pentazolate salt driven by hydrogen bonds

Mingjie Tang,<sup>a</sup> Zhaoyang Yin,<sup>a</sup> Zhiwei Zeng,<sup>a</sup> Yaqun Dong,<sup>a</sup> Wei Huang,<sup>\*a</sup> Yuji Liu,<sup>a</sup>  
Yongxing Tang<sup>\*a</sup>

<sup>a</sup>*School of Chemistry and Chemical Engineering, Nanjing University of Science and Technology,*

*Nanjing 210094, China.*

*E-mail: huang\_wei@njust.edu.cn; yongxing@njust.edu.cn*

## Table of contents

|                                                                     |            |
|---------------------------------------------------------------------|------------|
| <b>1. Experimental Section .....</b>                                | <b>S2</b>  |
| <b>2. Molecular Planarization Analysis.....</b>                     | <b>S3</b>  |
| <b>3. Computational Details and Physicochemical Properties.....</b> | <b>S4</b>  |
| <b>4. Crystallographic Data.....</b>                                | <b>S6</b>  |
| <b>5. NMR Spectra .....</b>                                         | <b>S14</b> |
| <b>6. TG-DSC Plot.....</b>                                          | <b>S15</b> |
| <b>7. Infrared spectrum .....</b>                                   | <b>S15</b> |
| <b>8. High-performance liquid chromatography .....</b>              | <b>S16</b> |
| <b>9. References .....</b>                                          | <b>S17</b> |

## 1. Experimental Section

### 1.1 Safety Precautions

Some compounds in the study are potential energetic materials that are sensitive to impact, friction and heat. During the whole experiment process, proper safety equipment (goggles, safety shields, rubber gloves, *etc.*) needs to be used to protect personal safety.

### 1.2 General Methods

Nuclear magnetic resonance (NMR) spectra were recorded on a Bruker 500 MHz nuclear magnetic resonance spectrometer. Chemical shifts are reported in relative to tetramethylsilane (TMS) for  $^1\text{H}$  and  $^{13}\text{C}$ . Decomposition temperature was measured using a STD-Q600 instrument at a nitrogen flow rate of  $50\text{ mL min}^{-1}$  and a heating rate of  $5\text{ }^\circ\text{C min}^{-1}$ . Infrared spectra (IR) was recorded on a PerkinElmer Spectrum BX FT-IR instrument. The detection wavelength was set to 270 nm. Elemental analyse of C/H/N was performed on a Vario EL III Analyzer. X-ray intensity data were collected on a Bruker D8 VENTURE PHOTON II system equipped with an Incoatecius 3.0 Microfocus sealed tube. The crystal structures were refined by Bruker SHELXTL software Package. The data were refined against  $F^2$ . All non-hydrogen atoms were refined anisotropically. Hydrogen atoms were located from difference Fourier maps and refined isotropically. Impact and friction sensitivities were measured by a BAM fallhammer and friction tester, respectively. Density was determined at room temperature with a Micromeritics AccuPyc II 1340 gas pycnometer. High-performance liquid chromatography (HPLC) was performed on Brave high-performance liquid chromatograph with welch Ultimate XB-C18 as the stationary phase and methanol (HPLC grade,  $1\text{ mL min}^{-1}$ ) as the mobile phase. The detection wavelength was set to 254 nm.

### 1.3 Synthesis

**Synthesis of 3:** 5-Amino-3-(2,2-diamino-1-nitrovinyl)-1*H*-1,2,4-triazole hydro- chloride (**2**) and  $\text{AgN}_5$  were synthesized according to literature methods <sup>[1,2]</sup>.  $\text{AgN}_5$  (0.21 g, 1.2 mmol) was suspended in water (5 mL). Then the aqueous solution of **2** (0.22 g, 1 mmol) was added. The mixtures were stirred at room temperature in dark for 0.5 h. The salt (**3**) was obtained as a pure white powder by filtering and then evaporating the solvent.

White solid. Yield 0.225 g (88%).  $T_d = 125.9\text{ }^\circ\text{C}$ .  $^1\text{H}$  NMR (DMSO- $d_6$ , 500 MHz)  $\delta$ : 13.55 (s, 2H), 7.97 (s, 6H) ppm.  $^{13}\text{C}\{^1\text{H}\}$  NMR (DMSO- $d_6$ , 126 MHz)  $\delta$ : 158.6, 157.8, 147.7, 103.9 ppm. IR

(KBr,  $\nu/\text{cm}^{-1}$ ): 3475, 3340, 3278, 3143, 2763, 1697, 1614, 1558, 1357, 1226, 1039, 829. Anal. Calc. for  $\text{C}_4\text{H}_8\text{N}_{12}\text{O}_2$ : C, 18.75; H, 3.15; N, 65.61 Found: C, 18.72; H, 3.16; N, 65.59.

## 2. Molecular Planarization Analysis

To illustrate the effect of protonation on the planarity of structures, the molecular planarity parameter (MPP) and the span of deviation from plane (SDP) were used. The calculations were employed using Gaussian 09 program and the analyses were performed by the wavefunction analysis Multiwfn 3.8 (dev) code. The results indicate that protonation promotes the planarization of the structure.

**Table S1.** The influence of protonation on structure planarity

| Compound [3-6]                                                                      | Structure                                                                           | Planarity <sup>a</sup>                                                                |
|-------------------------------------------------------------------------------------|-------------------------------------------------------------------------------------|---------------------------------------------------------------------------------------|
| 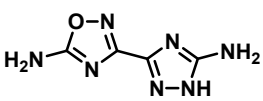   |    |    |
|   |   |   |
|  |  |  |
|  |  |  |
|  |  |  |
|  |  |  |

<sup>a</sup>.MPP and SDP of compounds. The color depth represents the span perpendicular to the fitting plane. The color scale is -0.2 Å to 0.2 Å.

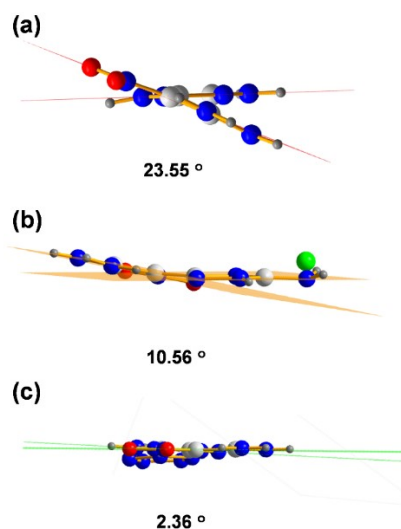

**Figure S1.** The dihedral angles for **1(a)**, the cation of **2(b)** and **3(c)**.

### 3. Computational Details and Physicochemical Properties

Theoretical calculations were performed using the Gaussian 09 program package. The gas phase heats of formation of cation **3** was calculated based on an isodesmic reaction (Scheme S1). The gas phase heat of formation of *cyclo*-N<sub>5</sub><sup>-</sup> was obtained from a literature<sup>[7]</sup>. The enthalpy of reaction was obtained by combining the MP2/6-311++G\*\* energy difference for the reactions, the scaled zero-point energies (*ZPE*), values of thermal correction (HT), and other thermal factors. Heats of formation (HOF) of salt **3** were calculated based on a Born–Haber energy cycle and the computational method of heats of formation (HOF) refer to a literature<sup>[7]</sup>.

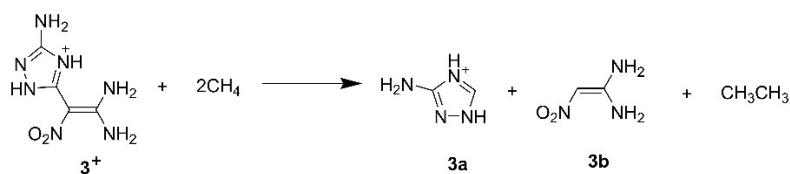

**Scheme S1.** Isodesmic reaction for **3<sup>+</sup>**, **3a** and **3b**.

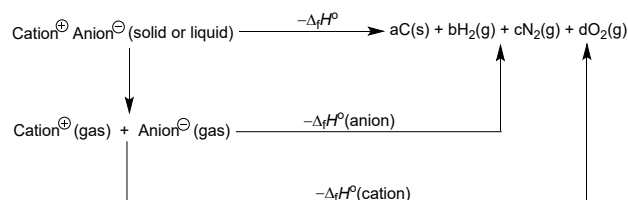

**Scheme S2.** Born–Haber cycle for the formation of HILs; the number of moles of the respective products are given by a, b, c, and d.

**Table S2.** Calculated zero point energy (*ZPE*), values of the correction ( $H_r$ ), total energy ( $E_0$ ) and heats of formation (*HOF*).

| Species                                                  | $ZPE^{[a]}$ | $H_r^{[b]}$ | $E_0^{[c]}$ | corrected $E_0$ | $HOF^{[d]}$           |
|----------------------------------------------------------|-------------|-------------|-------------|-----------------|-----------------------|
| <b>3<sup>+</sup></b>                                     | 0.1585      | 0.17181     | -689.04     | -688.87         | 710.65                |
| <b>3a</b>                                                | 0.07311     | 0.07767     | -242.01     | -241.93         | -65.31 <sup>[e]</sup> |
| <b>3b</b>                                                | 0.08996     | 0.09775     | -392.93     | -392.83         | 710.76 <sup>[e]</sup> |
| CH <sub>4</sub>                                          | 0.04479     | 0.04861     | -40.38      | -40.33          | -74.6                 |
| CH <sub>3</sub> CH <sub>3</sub>                          | 0.07461     | 0.07904     | -79.57      | -79.50          | -84                   |
| <i>cyclo</i> -N <sub>5</sub> <sup>-</sup> <sup>[7]</sup> | -           | -           | -           | -               | 249.87                |

<sup>[a]</sup> *ZPE* (hartree): zero-point energy. <sup>[b]</sup>  $H_r$  (hartree): values of the correction. <sup>[c]</sup>  $E_0$  (kJ mol<sup>-1</sup>): total energy. <sup>[d]</sup> *HOF* (kJ mol<sup>-1</sup>): heats of formation. <sup>[e]</sup> data obtained from G2.

**Table S3.** The calculated enthalpy.

| Comp.    | $\Delta H_{\text{cation}}$<br>(kJ mol <sup>-1</sup> ) | $\Delta H_{\text{anion}}$<br>(kJ mol <sup>-1</sup> ) | $\Delta H_{\text{Lat}}$<br>(kJ mol <sup>-1</sup> ) | $\Delta H_{\text{salt}}$<br>(kJ mol <sup>-1</sup> ) |
|----------|-------------------------------------------------------|------------------------------------------------------|----------------------------------------------------|-----------------------------------------------------|
| <b>3</b> | 710.65                                                | 249.87                                               | 475.12                                             | 485.4                                               |

Based on the enthalpy of formation and density, the detonation velocity ( $D$ ) and pressure ( $P$ ) of compound **3** are calculated by *Explo5 v6.05.02* program.

**Table S4.** Physicochemical and detonation performances of **1** and **3**.

| Comp.    | $T_d^a$<br>°C | $\rho^b$<br>g cm <sup>-3</sup> | $\Delta_f H^c$<br>kJ mol <sup>-1</sup> | $D^d$<br>m s <sup>-1</sup> | $P^e$<br>GPa | $FS^f$<br>N | $IS^g$<br>J |
|----------|---------------|--------------------------------|----------------------------------------|----------------------------|--------------|-------------|-------------|
| <b>1</b> | 264           | 1.76                           | 37.8                                   | 8451                       | 23.3         | 30          | 320         |
| <b>3</b> | 125.9         | 1.62                           | 485.4                                  | 8274                       | 24.4         | ≥40         | ≥360        |

<sup>a</sup>Decomposition temperature. <sup>b</sup>Density of samples measured with a gas pycnometer at room temperature. <sup>c</sup>Calculated enthalpy of formation. <sup>d</sup>Calculated detonation velocity. <sup>e</sup>Calculated detonation pressure. <sup>f</sup>Friction sensitivity. <sup>g</sup>Impact sensitivity.

## 4. Crystallographic Data

Table S5. Crystallographic data and structure refinement for **2**.

|                                             |                                                                |
|---------------------------------------------|----------------------------------------------------------------|
| CCDC number                                 | 2309781                                                        |
| Empirical formula                           | C <sub>4</sub> H <sub>8</sub> N <sub>7</sub> O <sub>2</sub> Cl |
| Formula weight                              | 221.62                                                         |
| Temperature/K                               | 173(2)                                                         |
| Crystal system                              | Orthorhombic                                                   |
| Space group                                 | <i>Pna</i> 2 <sub>1</sub>                                      |
| <i>a</i> /Å                                 | 9.6066(6)                                                      |
| <i>b</i> /Å                                 | 19.8590(14)                                                    |
| <i>c</i> /Å                                 | 4.6599(2)                                                      |
| <i>α</i> /°                                 | 90                                                             |
| <i>β</i> /°                                 | 90                                                             |
| <i>γ</i> /°                                 | 90                                                             |
| Volume/Å <sup>3</sup>                       | 889.00(9)                                                      |
| <i>Z</i>                                    | 4                                                              |
| $\rho_{\text{calc}}/\text{g cm}^{-3}$       | 1.656                                                          |
| $\mu/\text{mm}^{-1}$                        | 0.419                                                          |
| <i>F</i> (000)                              | 456.0                                                          |
| Crystal size/mm <sup>3</sup>                | 0.41×0.06×0.05                                                 |
| Radiation                                   | MoK $\alpha$ ( $\lambda = 0.71073$ Å)                          |
| 2 $\Theta$ range for data collection/°      | 5.9 to 52.726                                                  |
| Reflections collected                       | 6900                                                           |
| Independent reflections                     | 1800 [ $R_{\text{sigma}} = 0.0417$ ]                           |
| Data/restraints/parameters                  | 1800/17/151                                                    |
| Goodness-of-fit on <i>F</i> <sup>2</sup>    | 1.046                                                          |
| Final R indexes [ $I \geq 2\sigma(I)$ ]     | $R_1 = 0.0315$ , $wR_2 = 0.0627$                               |
| Final R indexes [all data]                  | $R_1 = 0.0399$ , $wR_2 = 0.0655$                               |
| Largest diff. peak/hole / e Å <sup>-3</sup> | 0.21/−0.21                                                     |

**Table S6.** Bond lengths for **2**.

| Atom | Atom | Length/Å | Atom | Atom | Length/Å |
|------|------|----------|------|------|----------|
| C1   | N2   | 1.328(4) | C3   | N7   | 1.375(4) |
| C1   | N3   | 1.348(4) | C4   | N5   | 1.328(4) |
| C1   | N4   | 1.320(4) | C4   | N6   | 1.321(4) |
| C2   | C3   | 1.456(4) | N1   | N2   | 1.384(4) |
| C2   | N1   | 1.312(4) | N7   | O1   | 1.263(3) |
| C2   | N3   | 1.373(4) | N7   | O2   | 1.264(3) |
| C3   | C4   | 1.454(5) |      |      |          |

**Table S7.** Bond angles for **2**.

| Atom | Atom | Atom | Angle/°  | Atom | Atom | Atom | Angle/°  |
|------|------|------|----------|------|------|------|----------|
| N2   | C1   | N3   | 105.7(3) | N5   | C4   | C3   | 119.4(3) |
| N4   | C1   | N2   | 128.8(3) | N6   | C4   | C3   | 122.1(3) |
| N4   | C1   | N3   | 125.5(3) | N6   | C4   | N5   | 118.4(3) |
| N1   | C2   | C3   | 124.1(3) | C2   | N1   | N2   | 104.3(3) |
| N1   | C2   | N3   | 110.3(3) | C1   | N2   | N1   | 111.7(3) |
| N3   | C2   | C3   | 125.5(3) | C1   | N3   | C2   | 107.9(3) |
| C2   | C3   | C4   | 121.2(3) | O1   | N7   | C3   | 122.1(3) |
| N7   | C3   | C2   | 118.1(3) | O1   | N7   | O2   | 118.3(2) |
| N7   | C3   | C4   | 120.7(3) | O2   | N7   | C3   | 119.6(3) |

**Table S8.** Torsion angles for **2**.

| Atom | Atom | Atom | Atom | Angle/°   |
|------|------|------|------|-----------|
| C2   | C3   | C4   | N5   | -7.0(5)   |
| C2   | C3   | C4   | N6   | 173.1(3)  |
| C2   | C3   | N7   | O1   | -176.4(3) |
| C2   | C3   | N7   | O2   | 3.1(4)    |
| C2   | N1   | N2   | C1   | -2.1(3)   |
| C3   | C2   | N1   | N2   | -175.9(3) |
| C3   | C2   | N3   | C1   | 176.6(3)  |
| C4   | C3   | N7   | O1   | 1.1(4)    |
| C4   | C3   | N7   | O2   | -179.4(3) |
| N1   | C2   | C3   | C4   | 9.3(5)    |
| N1   | C2   | C3   | N7   | -173.2(3) |
| N1   | C2   | N3   | C1   | -1.1(4)   |
| N2   | C1   | N3   | C2   | -0.3(4)   |
| N3   | C1   | N2   | N1   | 1.5(3)    |
| N3   | C2   | C3   | C4   | -168.1(3) |
| N3   | C2   | C3   | N7   | 9.4(4)    |
| N3   | C2   | N1   | N2   | 1.9(3)    |
| N4   | C1   | N2   | N1   | -176.7(3) |
| N4   | C1   | N3   | C2   | 178.0(3)  |
| N7   | C3   | C4   | N5   | 175.6(3)  |
| N7   | C3   | C4   | N6   | -4.3(5)   |



**Table S9.** Hydrogen bonds for **2**.

| D  | H   | A                | d(D-H)/Å  | d(H-A)/Å  | d(D-A)/Å | D-H-A/° |
|----|-----|------------------|-----------|-----------|----------|---------|
| N2 | H2  | C11 <sup>1</sup> | 0.86(2)   | 2.26(2)   | 3.103(2) | 168(3)  |
| N3 | H3  | C11              | 0.86(2)   | 2.47(2)   | 3.169(2) | 139(2)  |
| N4 | H4a | O2 <sup>1</sup>  | 0.900(18) | 1.930(19) | 2.820(3) | 169(2)  |
| N4 | H4b | C11              | 0.910(18) | 2.40(2)   | 3.229(2) | 151(2)  |
| N5 | H5a | C11 <sup>2</sup> | 0.905(18) | 2.45(2)   | 3.288(2) | 154(2)  |
| N5 | H5b | N1               | 0.925(18) | 1.93(2)   | 2.653(3) | 134(2)  |
| N6 | H6a | O1               | 0.880(19) | 1.88(2)   | 2.575(3) | 135(2)  |
| N6 | H6b | C11 <sup>2</sup> | 0.880(19) | 2.39(2)   | 3.224(2) | 158(3)  |

<sup>1</sup> 1/2+X, 1/2-Y, 1+Z; <sup>2</sup> 3/2-X, -1/2+Y, 1/2+Z

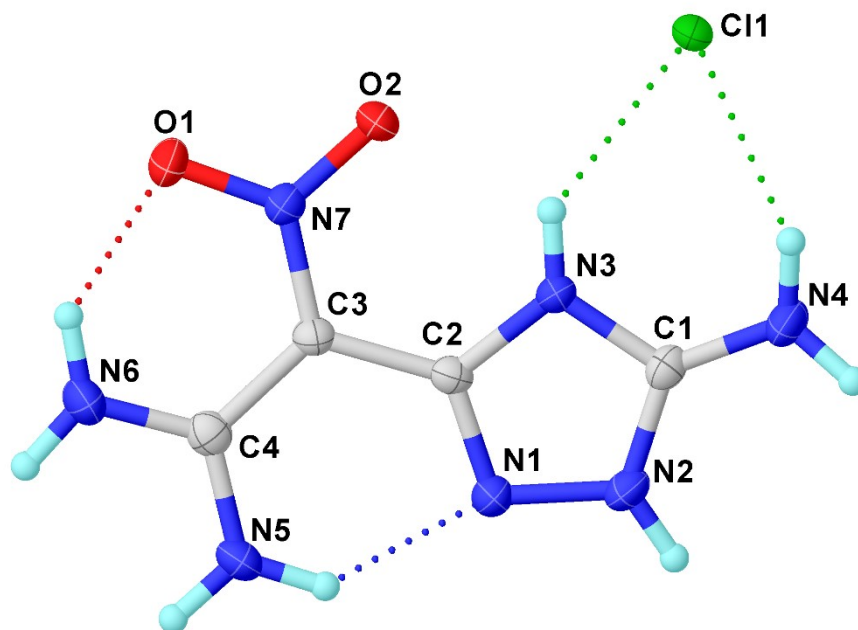**Figure S2.** Thermal ellipsoid plot for **2**. Ellipsoids are drawn at the 50% probability level.

**Table S10.** Crystallographic data and structure refinement for **3**.

|                                             |                                                              |
|---------------------------------------------|--------------------------------------------------------------|
| CCDC number                                 | 2309780                                                      |
| Empirical formula                           | C <sub>4</sub> H <sub>8</sub> N <sub>12</sub> O <sub>2</sub> |
| Formula weight                              | 256.22                                                       |
| Temperature/K                               | 190.0                                                        |
| Crystal system                              | Triclinic                                                    |
| Space group                                 | <i>P</i> -1                                                  |
| <i>a</i> /Å                                 | 6.5961(17)                                                   |
| <i>b</i> /Å                                 | 7.3355(15)                                                   |
| <i>c</i> /Å                                 | 11.576(2)                                                    |
| <i>α</i> /°                                 | 97.689(9)                                                    |
| <i>β</i> /°                                 | 104.047(11)                                                  |
| <i>γ</i> /°                                 | 99.886(11)                                                   |
| Volume/Å <sup>3</sup>                       | 526.2(2)                                                     |
| <i>Z</i>                                    | 2                                                            |
| $\rho_{\text{calc}}/\text{g cm}^{-3}$       | 1.617                                                        |
| $\mu/\text{mm}^{-1}$                        | 1.159                                                        |
| <i>F</i> (000)                              | 264.0                                                        |
| Crystal size/mm <sup>3</sup>                | 0.2×0.1×0.1                                                  |
| Radiation                                   | CuK $\alpha$ ( $\lambda = 1.54178$ Å)                        |
| 2 $\Theta$ range for data collection/°      | 13.528 to 145.26                                             |
| Reflections collected                       | 2062                                                         |
| Independent reflections                     | 2062 [ $R_{\text{sigma}} = 0.0294$ ]                         |
| Data/restraints/parameters                  | 2062/0/163                                                   |
| Goodness-of-fit on $F^2$                    | 1.030                                                        |
| Final R indexes [ $I \geq 2\sigma(I)$ ]     | $R_1 = 0.0359$ , $wR_2 = 0.1013$                             |
| Final R indexes [all data]                  | $R_1 = 0.0391$ , $wR_2 = 0.1040$                             |
| Largest diff. peak/hole / e Å <sup>-3</sup> | 0.28/−0.25                                                   |

**Table S11.** Bond lengths for **3**.

| Atom | Atom | Length/Å   | Atom | Atom | Length/Å   |
|------|------|------------|------|------|------------|
| N2   | N4   | 1.390(2)   | N4   | C7   | 1.293(2)   |
| O1   | N3   | 1.2605(15) | N8   | N9   | 1.3169(17) |
| O2   | N3   | 1.2775(15) | N8   | N12  | 1.3180(17) |
| N3   | C2   | 1.3609(17) | N9   | N10  | 1.3190(18) |
| N4   | C4   | 1.3189(18) | N10  | N11  | 1.3150(19) |
| N5   | N6   | 1.3679(16) | N11  | N12  | 1.3166(18) |
| N5   | C4   | 1.3254(18) | C1   | N1   | 1.3210(18) |
| N6   | C3   | 1.3068(18) | C1   | N2   | 1.3148(18) |
| N7   | C3   | 1.3788(17) | C1   | C2   | 1.4653(18) |
| N7   | C4   | 1.3465(17) | C2   | C3   | 1.4507(19) |

**Table S12.** Bond angles for **3**.

| Atom | Atom | Atom | Angle/°    | Atom | Atom | Atom | Angle/°    |
|------|------|------|------------|------|------|------|------------|
| O1   | N3   | O2   | 117.90(10) | N2   | C1   | N1   | 118.83(12) |
| O1   | N3   | C2   | 122.65(11) | N2   | C1   | C2   | 121.56(12) |
| O2   | N3   | C2   | 119.45(11) | N3   | C2   | C1   | 120.48(12) |
| C4   | N5   | N6   | 111.22(11) | N3   | C2   | C3   | 118.79(11) |
| C3   | N6   | N5   | 105.34(11) | C3   | C2   | C1   | 120.73(12) |
| C4   | N7   | C3   | 107.19(11) | N6   | C3   | N7   | 109.91(12) |
| N9   | N8   | N12  | 107.99(12) | N6   | C3   | C2   | 122.46(12) |
| N8   | N9   | N10  | 107.79(12) | N7   | C3   | C2   | 127.62(12) |
| N11  | N10  | N9   | 108.25(11) | N4   | C4   | N5   | 127.11(13) |
| N10  | N11  | N12  | 107.85(12) | N4   | C4   | N7   | 126.55(13) |
| N11  | N12  | N8   | 108.11(12) | N5   | C4   | N7   | 106.33(12) |
| N1   | C1   | C2   | 119.60(12) |      |      |      |            |

**Table S13.** Torsion angles for **3**.

| Atom | Atom | Atom | Atom | Angle/°     |
|------|------|------|------|-------------|
| O1   | N3   | C2   | C1   | -1.1(2)     |
| O1   | N3   | C2   | C3   | 179.42(11)  |
| O2   | N3   | C2   | C1   | 178.30(11)  |
| O2   | N3   | C2   | C3   | -1.14(19)   |
| N3   | C2   | C3   | N6   | -177.70(12) |
| N3   | C2   | C3   | N7   | 2.9(2)      |
| N5   | N6   | C3   | N7   | 0.53(15)    |
| N5   | N6   | C3   | C2   | -178.93(12) |
| N6   | N5   | C4   | N4   | 178.87(14)  |
| N6   | N5   | C4   | N7   | -0.10(16)   |
| N8   | N9   | N10  | N11  | -0.52(16)   |
| N9   | N8   | N12  | N11  | -0.47(16)   |
| N9   | N10  | N11  | N12  | 0.23(16)    |
| N10  | N11  | N12  | N8   | 0.15(16)    |
| N12  | N8   | N9   | N10  | 0.61(16)    |
| C1   | C2   | C3   | N6   | 2.9(2)      |
| C1   | C2   | C3   | N7   | -176.50(12) |
| N1   | C1   | C2   | N3   | 179.80(12)  |
| N1   | C1   | C2   | C3   | -0.77(19)   |
| N2   | C1   | C2   | N3   | -0.6(2)     |
| N2   | C1   | C2   | C3   | 178.84(12)  |
| C3   | N7   | C4   | N4   | -178.56(14) |
| C3   | N7   | C4   | N5   | 0.42(15)    |
| C4   | N5   | N6   | C3   | -0.27(16)   |
| C4   | N7   | C3   | N6   | -0.61(15)   |
| C4   | N7   | C3   | C2   | 178.82(13)  |

**Table S14.** Hydrogen bonds for **3**.

| D  | H   | A                | d(D-H)/Å | d(H-A)/Å   | d(D-A)/Å   | D-H-A/°   |
|----|-----|------------------|----------|------------|------------|-----------|
| N4 | H4a | N9               | 0.8800   | 2.0577(19) | 2.929(2)   | 170.57(6) |
| N4 | H4b | N12 <sup>1</sup> | 0.8800   | 2.0897(18) | 2.9375(18) | 161.49(5) |
| N5 | H5  | O2 <sup>2</sup>  | 0.8800   | 1.9467(15) | 2.8045(16) | 164.48(5) |
| N7 | H7  | N8 <sup>1</sup>  | 0.8800   | 2.1162(17) | 2.9106(17) | 149.80(4) |
| N1 | H1a | N11 <sup>3</sup> | 0.8800   | 2.0961(17) | 2.9634(18) | 168.40(5) |
| N1 | H1b | N6               | 0.8800   | 1.8943(17) | 2.5993(18) | 135.89(5) |
| N2 | H2a | N10 <sup>3</sup> | 0.8800   | 2.1648(17) | 3.0246(18) | 165.41(5) |
| N2 | H2b | O1               | 0.8800   | 1.8982(16) | 2.5603(16) | 130.67(5) |

<sup>1</sup>+X, 1+Y, +Z; <sup>2</sup>+X, -1+Y, +Z; <sup>3</sup>1+X, 1+Y, 1+Z

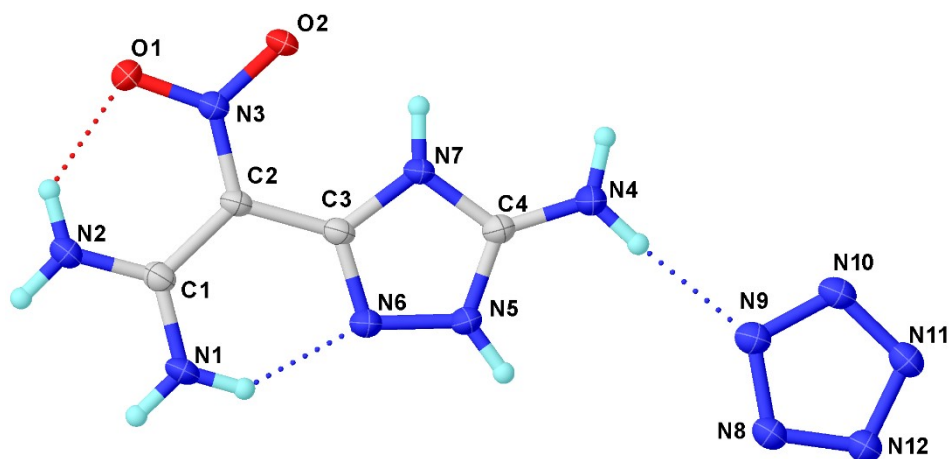**Figure S3.** Thermal ellipsoid plot for **3**. Ellipsoids are drawn at the 50% probability level.

## 5. NMR Spectra

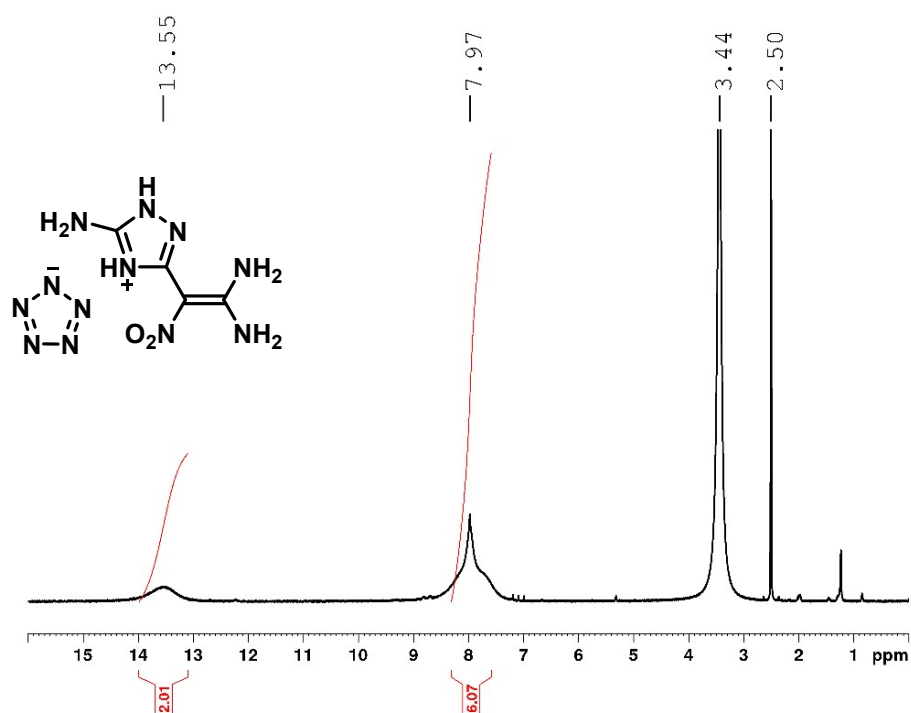

Figure S4.  $^1\text{H}$  NMR spectrum (500 MHz,  $\text{DMSO-}d_6$ ) of **3**.

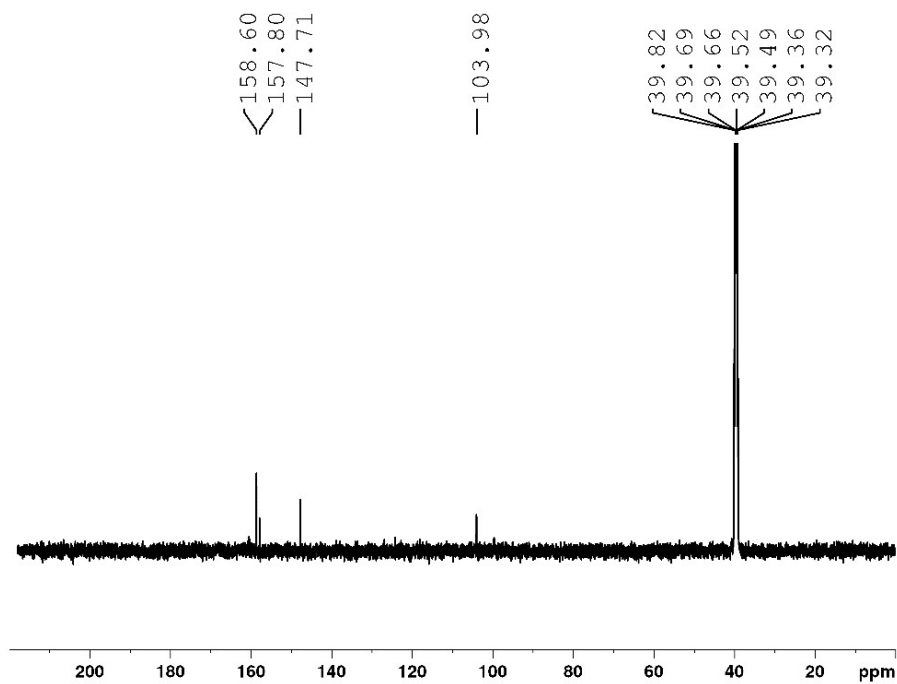

Figure S5.  $^{13}\text{C}$   $\{^1\text{H}\}$  NMR spectrum (126 MHz,  $\text{DMSO-}d_6$ ) of **3**.

## 6. TG-DSC Plot

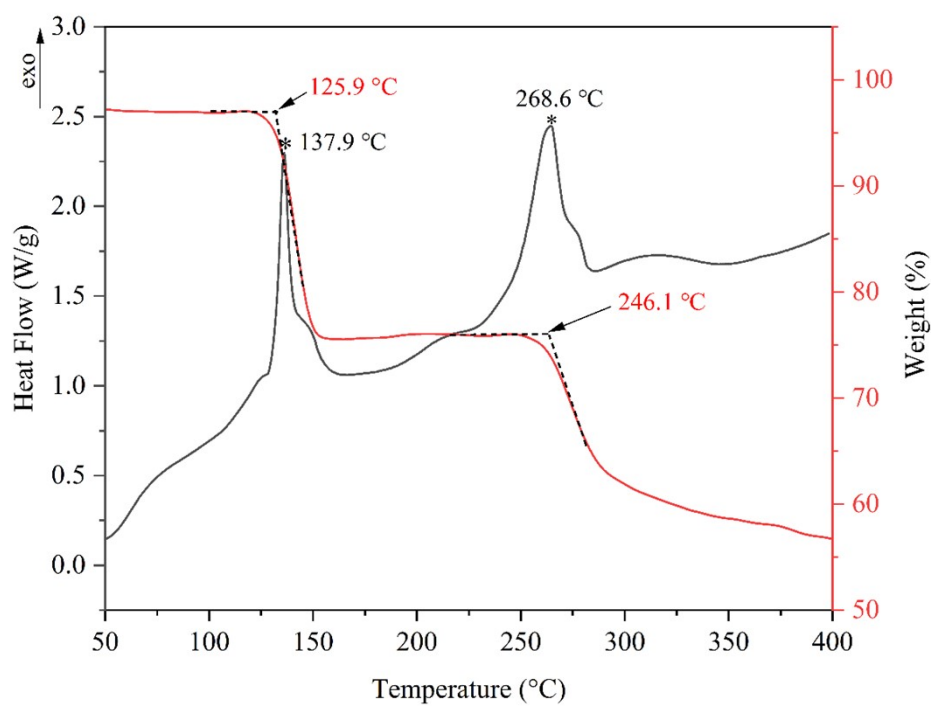

Figure S6. TG-DSC plot (heating rate = 5 °C min<sup>-1</sup>) of **3**.

## 7. Infrared spectrum

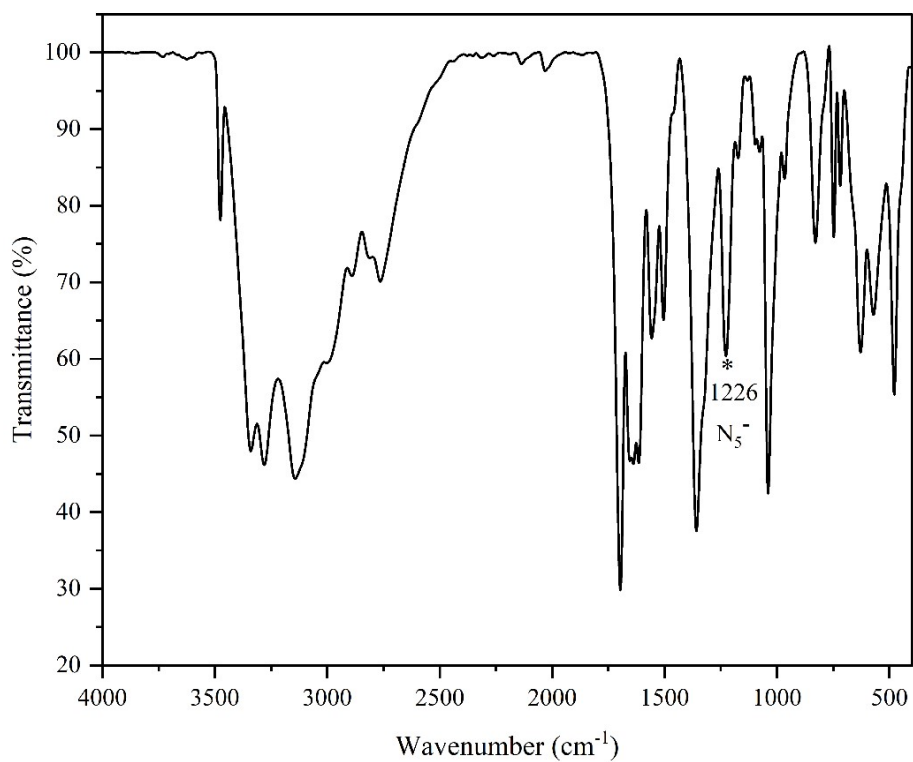

Figure S7. Infrared spectrum of **3**.

## 8. High-performance liquid chromatography

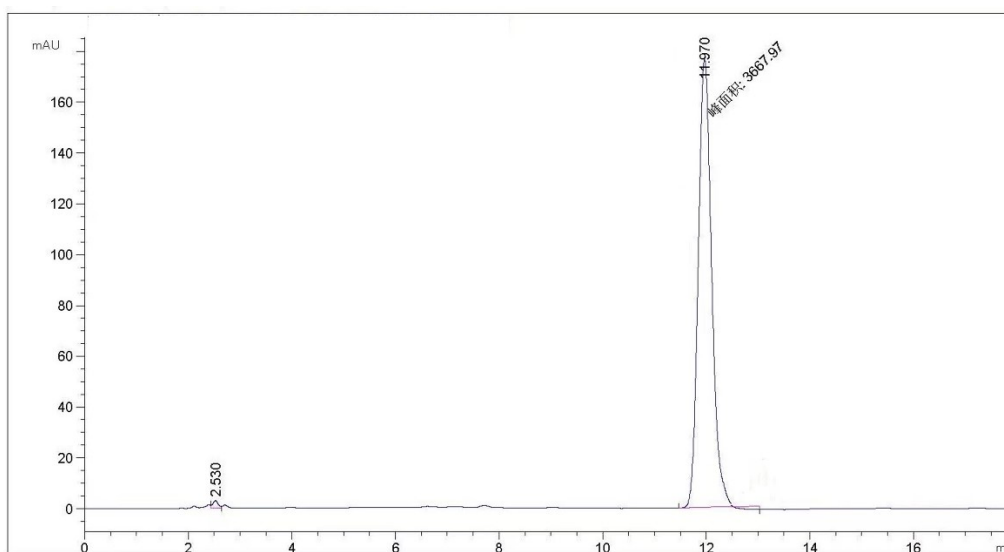

**Figure S8.** High-performance liquid chromatogram of **3**.

**Table S15.** HPLC peak chart of **3**.

| Peak No. | Retention Time<br>(min) | Peak Area<br>(mAU·s) | Peak Height<br>(mAU) | Peak Area<br>(%) |
|----------|-------------------------|----------------------|----------------------|------------------|
| 1        | 2.530                   | 20.77                | 2.922                | 0.566            |
| 2        | 11.970                  | 3667.97              | 176.184              | 99.434           |
| Total    |                         | 3688.74              | 179.106              | 100.000          |



## 9. References

- [1] Yin, Z.; Huang, W.; Zeng, Z.; Liu, Y.; Shreeve, J. M.; Tang, Y. Toward advanced high-performance insensitive FOX-7-like energetic materials via positional isomerization[J]. *ACS Appl. Mater. Interfaces*. **2022**, *14*(44), 49847–49853.
- [2] Xu, Y.; Tian, L.; Li, D.; Wang, P.; Lu, M. A series of energetic *cyclo*-pentazolate salts: rapid synthesis, characterization, and promising performance. *J. Mater. Chem. A*, **2019**, *7*(20), 12468–12479.
- [3] Cao, W.; Wang, T.; Dong, W.; Lu, Z.; Tarig, Q.; Manzoor, S.; Zhang, J. Synthesis and characterization of energetic salts based on a new coplanar bicyclic cation-5-amino-3-(5-amino-1,2,4-oxadiazol-3-yl)-1*H*-1,2,4-triazolium. *J. Mol. Struct.* **2022**, *1248*, 131438.
- [4] Zhang, J.; Jin, Z.; Xia, Y.; Li, Y.; Hao, W.; Guo, Z.; Wang, Y.; Peng, R.; Jin, B. A  $\pi$ -stacking highly stable insensitive energetic inner salt and its insensitive energetic salts. *CrystEngComm*. **2023**, *25*(21): 1381-1388.
- [5] Yin, Z.; Dong, Y.; Zeng, Z.; Huang, W.; Tang, Y. Crystal structures and properties of high-nitrogen energetic salts based on (*Z*)-1,1-diamino-2-nitro-2-(1*H*-tetrazol-5-yl)ethene. *New J. Chem.* **2021**, *45*(26), 11752–11757.
- [6] Tang, Y.; Huang, W.; Imler, G. H.; Shreeve, J. M. Enforced planar FOX-7-like molecules: a strategy for thermally stable and insensitive  $\pi$ -conjugated energetic materials. *J. Am. Chem. Soc.* **2020**, *142*(15), 7153–7160.
- [7] Liao, S.; Zhou, Z.; Wang, K.; Jin, Y.; Luo, J.; Liu, T. Synthesis of 5/6/5-fused tricyclic-cation-based *cyclo*-N<sub>5</sub><sup>-</sup> salt with high density and heat of formation. *Energ. Mater. Front.* **2020**, *1*(3-4), 172–177.
